# Supplementary material for: Reevaluating the relationship between EGL-43 (EVI1) and LIN-12 (Notch) during C. elegans anchor cell invasion
Source: Oxford University Press journal article supplement (doi:10.1242/bio.059668), 2022-11-29
Supplement: bio059668supp.pdf [file bio059668supp.pdf]

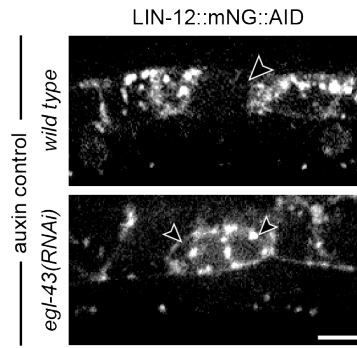

**Fig. S1. EGL-43 depletion leads to ectopic LIN-12 expression on the AC membrane.** Micrographs of mid-L3 larvae at the time of AC invasion expressing LIN-12::mNeonGreen::AID in wild type (top; extracted from Fig. 3A) or after *egl-43(RNAi)* (bottom; extracted from Fig. 3B) in the absence of 5-Ph-IAA. Treatments were initiated at the L1 larval stage. Note the presence of nuclear LIN-12::mNeonGreen::AID in the underlying D cells of wild-type controls. Scale bar, 5  $\mu$ m.

**Table S1. Strains**

| Name    | Genotype                                     | Source     |
|---------|----------------------------------------------|------------|
| DQM1125 | <i>bmd284 I; ljjf33 III; bmd299 V</i>        | This paper |
| DQM1159 | <i>bmd284 I; ieSi58 IV</i>                   | This paper |
| DQM1233 | <i>bmd284 I; wy1514 II; bmd202 V; qy20 X</i> | This paper |

**Table S2. Primers**

| Name    | Sequence (5' – 3')                                                                                                                                                                                                      | Type    | Amplicon                      | Template |
|---------|-------------------------------------------------------------------------------------------------------------------------------------------------------------------------------------------------------------------------|---------|-------------------------------|----------|
| DQM1136 | tgtaaacgacggccagtgcgccgcGT<br>TTGTGCAACAAATTGAGGAAG                                                                                                                                                                     | Forward | rpl-28p::TIR1(F79G)::T2A      | pCMH2123 |
| DQM1137 | caggtgacgtcgttggtcatggcccTCC<br>TGGGCCAGGATTCTC                                                                                                                                                                         | Reverse | rpl-28p::TIR1(F79G)::T2A      | pCMH2123 |
| CY419   | caataagacacgcgccgccatccctc<br>gtgcatcttcccttggggtgtgtcacaggg<br>ctcattctgtgacgtgcgctccacctt<br>aAcagtgtttatcaatctccgtctattca<br>ttagtgaataaatattccaggacggttga<br>cgtgcccaacgtgtcaaagtcagGGAG<br>CATCGGGAGCCTCAGGAGCat   | Forward | egl-43::TagRFP-T::AID::egl-43 | pWZ203   |
| CY420   | agttttcaaaataaactaacctgtgtg<br>ccatttgaagtatatgtggccaatattgca<br>cggaaactaatccactgctccgctcaatc<br>cggcaagttgcgccatcaatggtttgtaga<br>gtgcagtcatctcgaaactggtcgtgct<br>tcgtagtgccgcttgatggcatGGCT<br>CCGCTAGCTCCTGACTTGACG | Reverse | egl-43::TagRFP-T::AID::egl-43 | pWZ203   |

**Table S3. Plasmids**

| Name   | Backbone | Description                             |
|--------|----------|-----------------------------------------|
| pWZ259 | pWZ192   | rpl-28p::TIR1(F79G)::T2A::DHB::2xmKate2 |

**Table S4. Guides**

| Locus         | Sequence (5' – 3')   | Description                |
|---------------|----------------------|----------------------------|
| <i>egl-43</i> | GACGGAGATTGATAACACAC | Located upstream of exon 6 |
